# Supplementary material for: Expasy, the Swiss Bioinformatics Resource Portal, as designed by its users
Source: PubMed Central journal article supplement (PMC8265094; doi:10.1093/nar/gkab225), 2021-04-13
Supplement: gkab225_supplemental_file.pdf [file gkab225_supplemental_file.pdf]

## Supplementary File S1

### User research (Google Analytics, year 2018)

#### Users

| Parameters       | Numbers          |
|------------------|------------------|
| Total number     | 531,324          |
| Session/user     | ~2               |
| Session duration | ~3 minutes       |
| Bounce rate      | ~50% (very good) |

#### Geography

| Country            | % Users |
|--------------------|---------|
| United States      | 22%     |
| China              | 11%     |
| India              | 10%     |
| European countries | 17%     |

#### Devices

| Type    | % Users |
|---------|---------|
| Desktop | 94%     |
| Mobile  | 5%      |
| Tablet  | 1%      |

#### Acquisition

| Type           | % Users                                                                                                                                                                 |
|----------------|-------------------------------------------------------------------------------------------------------------------------------------------------------------------------|
| Organic search | 56%                                                                                                                                                                     |
| Direct         | 32%                                                                                                                                                                     |
| Referral       | 21%, coming from: <ul style="list-style-type: none"><li>• 61% web.expasy.org</li><li>• 5% prosite.expasy.org</li><li>• 3% enzyme.expasy.org</li><li>• 2% NCBI</li></ul> |

### Behavior flow (all pages)

| <b>Pages</b>               | <b>% Users</b>                                                                                                                                                                                                                                                                                                                                                                                                                                                                                            |
|----------------------------|-----------------------------------------------------------------------------------------------------------------------------------------------------------------------------------------------------------------------------------------------------------------------------------------------------------------------------------------------------------------------------------------------------------------------------------------------------------------------------------------------------------|
| /                          | 35%                                                                                                                                                                                                                                                                                                                                                                                                                                                                                                       |
| /<category>                | 20%, among which: <ul style="list-style-type: none"><li>• 80% /proteomics</li><li>• 13% /genomics</li><li>• 4% /transcriptomics</li></ul>                                                                                                                                                                                                                                                                                                                                                                 |
| /<category>/<sub-category> | 13%, among which: <ul style="list-style-type: none"><li>• 22% /proteomics/protein_structure</li><li>• 20% /proteomics/protein_sequences_and_identification</li><li>• 13% /genomics/sequence_alignment</li><li>• 8% /proteomics/protein_characterisation_and_function</li><li>• 6% /proteomics/post-translational_modification</li><li>• 6% /proteomics/families__patterns_and_profiles</li><li>• 6% /proteomics/similarity_search_alignment</li><li>• 4%/proteomics/protein-protein_interaction</li></ul> |

### Behavior flow (source)

| <b>Source type</b> |                                                                                                                                                                                                                                                     |
|--------------------|-----------------------------------------------------------------------------------------------------------------------------------------------------------------------------------------------------------------------------------------------------|
| Organic search     | <ul style="list-style-type: none"><li>• 54% land on Home page</li><li>• 5% land on /resources/search (Home page, "Find resource" selected)</li><li>• 5% land on /proteomics/protein_structure</li><li>• 27% land on 100+ different pages.</li></ul> |
| Direct access      | <ul style="list-style-type: none"><li>• 64% to the home page</li><li>• 12% to the /tools page</li><li>• 6% to the /proteomics page</li></ul>                                                                                                        |

## Supplementary File S2

### Expasy's Competitor Benchmarking

EMBL-EBI (<https://www.ebi.ac.uk/>)

The mission of EMBL-EBI, is to (i) make the world's public biological data freely available to the scientific community via a range of services and tools, (ii) perform basic research and (iii) provide professional training in bioinformatics. The EMBL-EBI website allows both the search for information on the institute itself (i.e. career pages, news, directory, ...) as well as the cross-resources search, and the discovery of the resources developed within the EMBL-EBI. A search bar is located at the top of the page and by default launches the 3 search types described above. A drop-down menu allows the user to refine his search by:

- Scientific search with a list of categories such as Genomic or Small molecule, which launches a cross-resources search,
- EBI content search, which allows, among other things, to discover the resources developed within the EMBL-EBI.

Top-right search bar allowing 3 types of searches:

- General information about EMBL-EBI (career pages, news, people, ...)
- Cross-resources search
- Regular search (explore the resources within the EMBL-EBI)

Dropdown box to refine the search:

- Scientific search (cross-resources search)
- EBI content search (regular search)

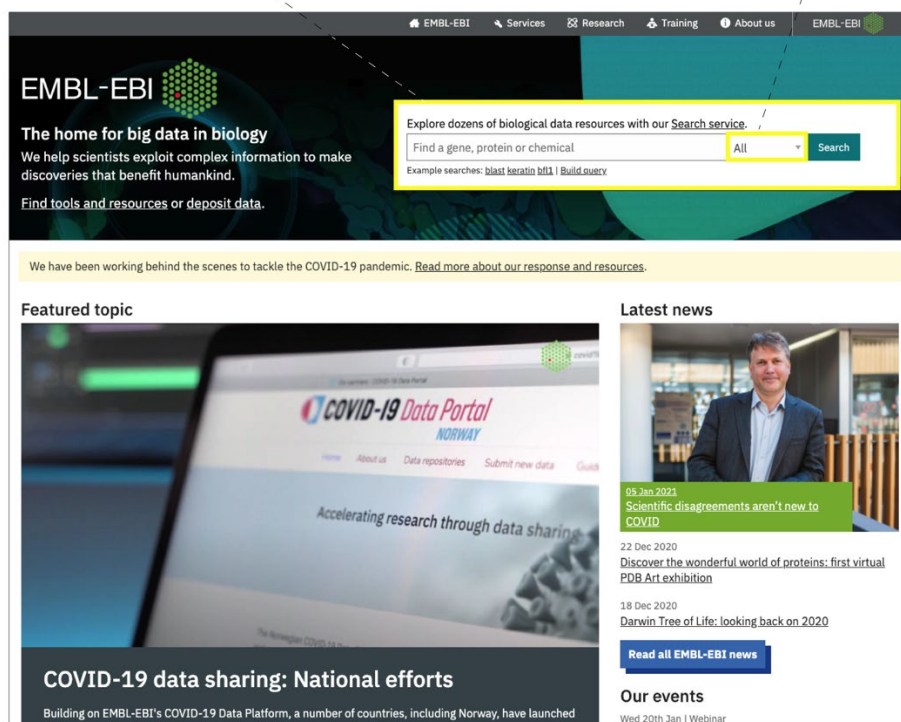

Figure 1: EMBL-EBI home page

NCBI (<https://www.ncbi.nlm.nih.gov/>)

NCBI's mission is, among other things, to create automated systems for the storage and analysis of knowledge in molecular biology, biochemistry and genetics and to facilitate the use of these databases and software by the research and medical community. The NCBI website includes a search bar at the top of the page. If the user wishes to limit their search to a certain dataset, they can select it from a drop-down menu. By default, the search performed is of type "cross-resources search". But in case a resource name (such as "BLAST") is detected, the corresponding web resource is described via a card at the top of

the results page. If a user is interested in exploring the resources developed within the NCBI framework, a menu on the left allows to filter the resources by category. The home page also provides a list of popular resources as well as some NCBI news.

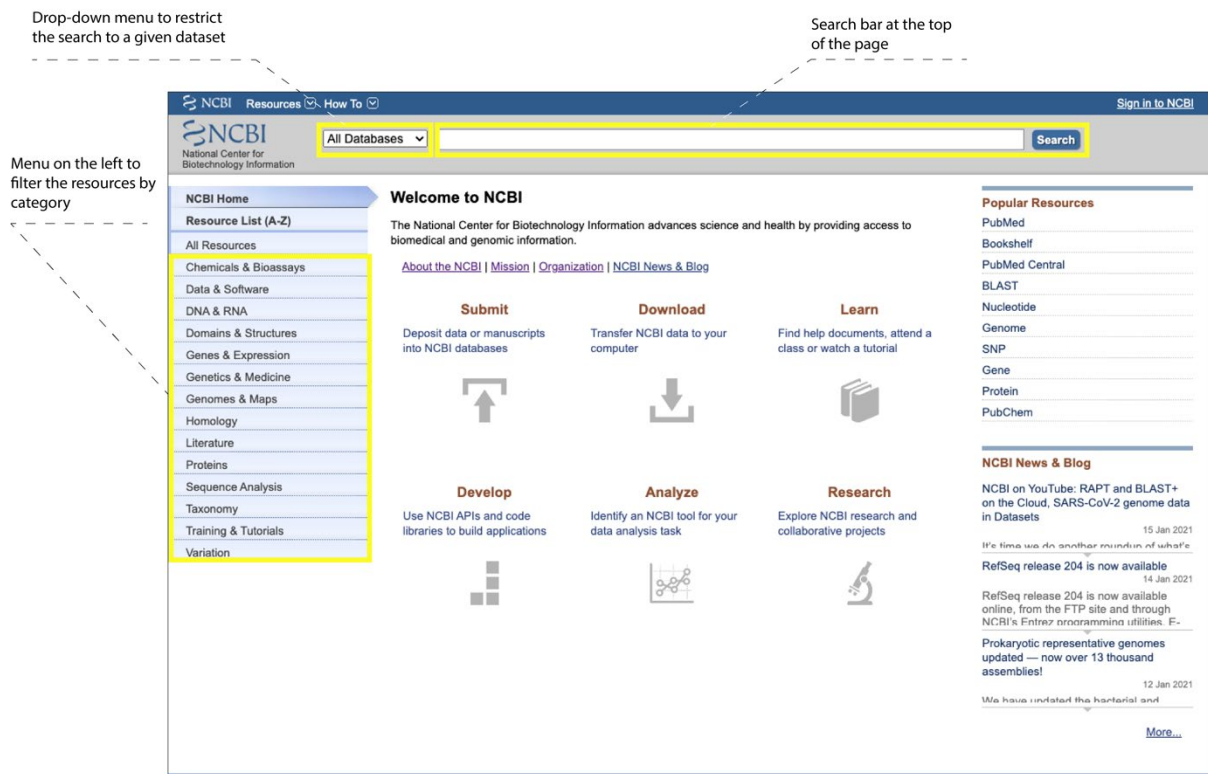

Figure 2: NCBI home page

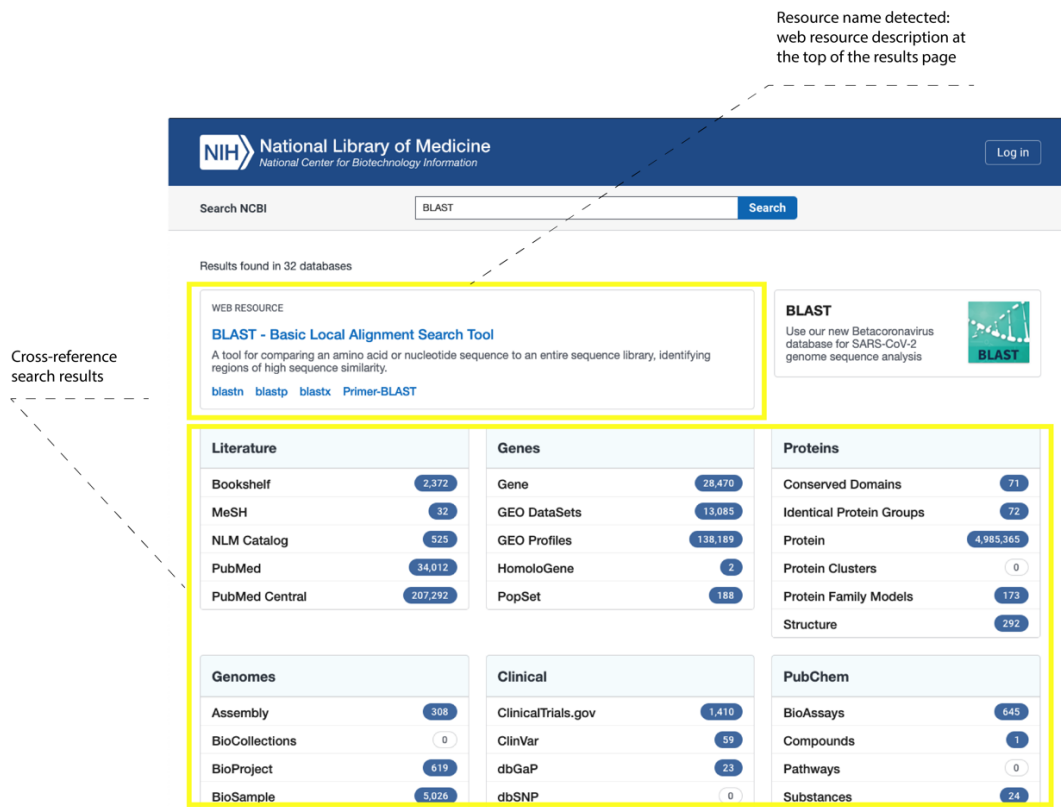

Figure 3: NCBI result page

**Bio.tools** (<https://bio.tools/>)

The bio.tools portal provides a comprehensive registry of software and databases, facilitating researchers from across the spectrum of biological and biomedical science to find, understand, utilise and cite the resources they need in their day-to-day work. A search bar allows the user to search for all information related to the resources. Through autocompletion, the user can limit the search to a certain type of information (such as Name, Topic, Operation, Input, Output, to name a few). In bio.tools, the resources are described using EDAM terms. All terms are clickable in the resource entries, allowing the user to find more resources with a given term. The resource curation is community driven and is based on more than 1000 contributors. As of January 2021, 16570 resources were described in bio.tools.

Use of EDAM terms for the resource descriptions

**What is bio.tools?**

The use of bioinformatics is ubiquitous within the life sciences. In *bio.tools*, we are striving to provide a **comprehensive registry** of software and databases, facilitating researchers from across the spectrum of biological and biomedical science to **find, understand, utilise and cite** the resources they need in their day-to-day work.

Everything from simple command-line tools and online services, through to databases and complex, multi-functional analysis workflows is included. Resources are described in a rigorous semantics and syntax, providing end-users with the convenience of **concise, consistent** and therefore **comparable** information.

Each *bio.tools* entry is assigned a human-readable, **unique identifier** based on the resource name, e.g. `biotools:signalp`. These identifiers provide a persistent reference to our "Tool Cards" of essential information, as well as a means to trace resources and integrate *bio.tools* data with other resources.

All the *bio.tools* data and technical components are available under **open license** and we warmly welcome you to **get involved**. *bio.tools* development is supported by ELIXIR - the European infrastructure for life science information.

 *bio.tools* is supported by ELIXIR through the **ELIXIR-EXCELERATE grant**, which is funded by the European Union Horizon 2020 program under grant agreement 676559.

|                                                                                                                                                                                                                                                                              |                                                                                                                                                                                                                             |                                                                                                                                                                                                                                                 |
|------------------------------------------------------------------------------------------------------------------------------------------------------------------------------------------------------------------------------------------------------------------------------|-----------------------------------------------------------------------------------------------------------------------------------------------------------------------------------------------------------------------------|-------------------------------------------------------------------------------------------------------------------------------------------------------------------------------------------------------------------------------------------------|
| <b>Open Data</b><br><i>bio.tools</i> content is freely available to all under CC BY 4.0 license - you are free to share and adapt the data, so long as you give credit and don't restrict the freedom of others.                                                             | <b>Open Source</b><br><i>bio.tools</i> source code is freely available to all under GPL-3.0 - you are free to share and adapt our software, but you must ensure it remains free for all its users.                          | <b>Built by You</b><br>We depend on the goodwill and enthusiasm of our 1000+ (and growing!) contributors - if you develop or provide tools and online services, please add them after signing-up.                                               |
| <b>Tool IDs</b><br>All <i>bio.tools</i> entries are assigned a human-friendly unique identifier, e.g. <code>biotools:signalp</code> . Once verified, a <i>bio.tools</i> ID provides a stable way to trace resources and integrate <i>bio.tools</i> data with other projects. | <b>Standard Semantics</b><br>The scientific function of <i>bio.tools</i> resources can be precisely annotated in defined terms from the EDAM ontology, including common topics, operations, types of data and data formats. | <b>Standard Syntax</b><br><i>bio.tools</i> resource descriptions adhere to a rigorous syntax defined by <code>biotoolsSchema</code> , which provides regular expressions, controlled vocabularies and other syntax rules for 50 key attributes. |
| <b>Community-driven</b><br>We rely upon scientific communities to improve the terminology and description of resources in different domains of the life sciences - we welcome your help with this work in progress.                                                          | <b>Backed by ELIXIR</b><br><i>bio.tools</i> is anchored within ELIXIR, the European Infrastructure for Biological Information. <i>bio.tools</i> will remain free, open and maintained in the long term.                     | <b>Tools Platform</b><br><i>bio.tools</i> is an integral part of the ELIXIR Tools Platform, enabling the development, description, discovery, re-use, deployment and benchmarking of software tools and workflows.                              |

Figure 4: Bio-tools home page

The BioCatalogue (<https://www.biocatalogue.org/>)

The BioCatalogue is a curated catalogue of life science web services. The BioCatalogue website is freely accessible to the world thanks to a powerful search engine. Expert curators and users join forces to provide high quality annotations for services. A search bar is located at the top of the page, together with a link which leads to a list of all the BioCatalogue web services, which can later on be filtered by category thanks to a menu on the left. As of January 2021, 1431 web services were described in the BioCatalogue.

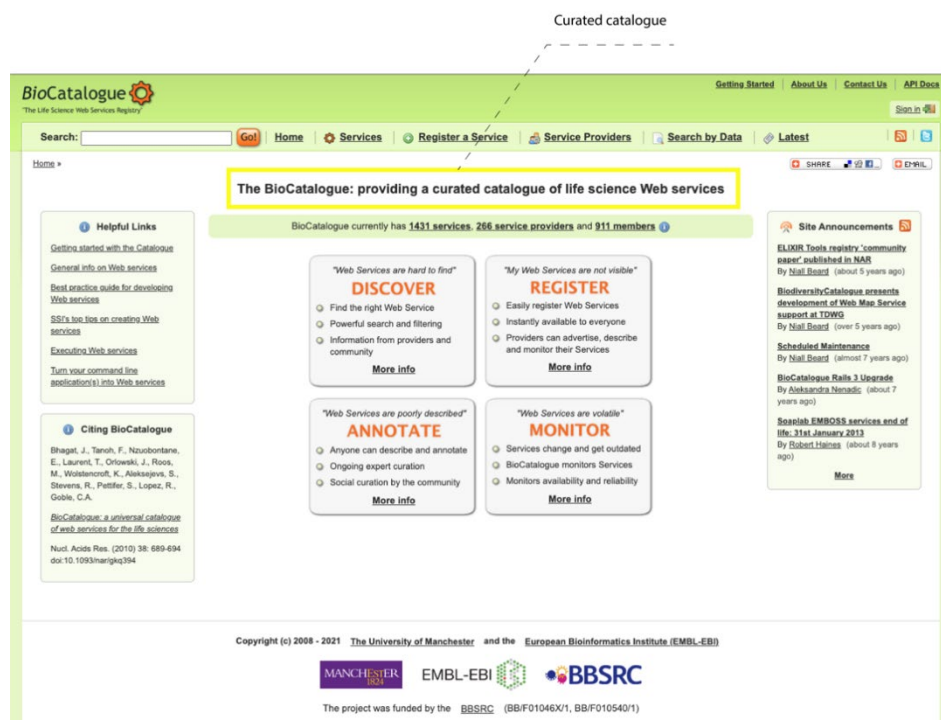

Figure 5: Biocatalogue home page

The strengths of each of the four competitors are shown in Table 1

Table 1: Good practices found in the four Exspasy's competitors

| Website      | Strengths                                                                                                                                             |
|--------------|-------------------------------------------------------------------------------------------------------------------------------------------------------|
| EMBL-EBI     | Unique search bar for different types of searches (institutional information, cross-reference and regular search)                                     |
| NCBI         | Unique search bar (cross-reference and regular search)<br>Filter by categories on the left<br>Joint results page (cross-reference and regular search) |
| Bio.tools    | Use of EDAM terms for the resource description                                                                                                        |
| Biocatalogue | Expert-curated catalogue                                                                                                                              |

# Supplementary File S3

## Personas

### Miranda, Jr Biologist - Beginner

After a PhD in Biology, Miranda is now moving to bioinformatics within SIB.

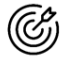

#### GOAL

- Miranda would like to explore the existing areas in bioinformatics, as well as the different tools, and databases in life sciences.
- Her fields of expertise are Glycomics and Evolutionary Biology.

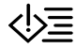

#### PAIN POINTS

- Doesn't know what the categories are, and which resources to pick up.
- Why are some of the resources in frame?
- What are the SIB resources? Are these of good quality?
- Why are there external resources? Are these of good quality?

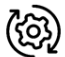

#### INTERACTION

- Miranda directly accesses <https://www.expasy.org>, because the site primarily showcases the SIB resources.

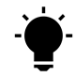

#### OPPORTUNITIES

- Add descriptions to categories.
- Better distinction between SIB resources and affiliated resources.
- Hide external resources, unless they were approved by stakeholders.
- Clean the resources in the existing database.

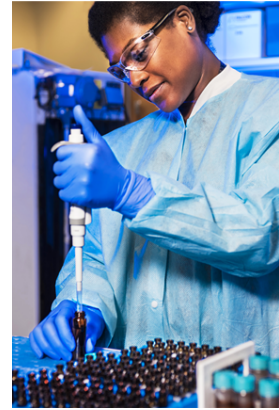

Figure 1: Miranda, Jr Biologist – Beginner.

Photo credits: unsplash.com

### Chloe, Bioinformatician - Intermediate

Interested in Gene Expression in *C. elegans*.

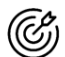

#### GOAL

- Chloe would like to find a tab-delimited file with expression data from her favorite organism. She uses her computer at work to achieve this mission.

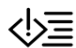

#### PAIN POINTS

- Didn't notice that she had to select "Find resource" in the drop-down box.

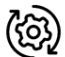

#### INTERACTION

- Chloe types "Portal bioinformatics resources" in Google, and clicks on the first hit <https://www.expasy.org/>;
- Chloe types "Gene expression" in the "Query all databases" box, and clicks on the "Search" button;
- Chloe does not understand the results, and looks at the left-menu;
- Chloe clicks on "Transcriptomics", and looks at the "Databases" column;
- Chloe sees "Bgee", and clicks on "More";
- Bgee seems to fulfill her expectations, she clicks on the link.

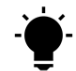

#### OPPORTUNITIES

- Better indexing by search engines.
- One search box, for "Find resource" and "Query all databases".

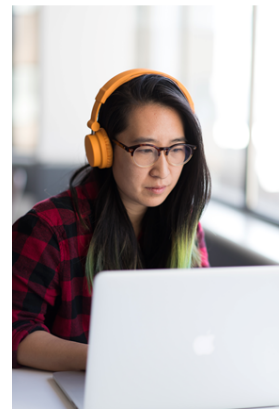

Figure 2: Chloe, Bioinformatician - Intermediate

Photo credits: unsplash.com

# Kris, Sr Biologist - Advanced

*Interested in neuron development*

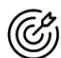

**GOAL**

- Kris would like to find a 360 overview of gene MEF2C. He uses his computer at work to achieve this mission.

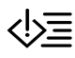

**PAIN POINTS**

- Doesn't understand which domains are covered by each resource.

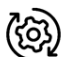

**INTERACTION**

- Kris directly accesses <https://www.expasy.org/> because one of his colleagues told him about ExPASy;
- Kris types "MEF2C" in the "Query all databases" box, and clicks on the "Search" button;
- Kris assesses the results, and browses through the resources.

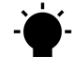

**OPPORTUNITIES**

- Sort the results by category/domain.

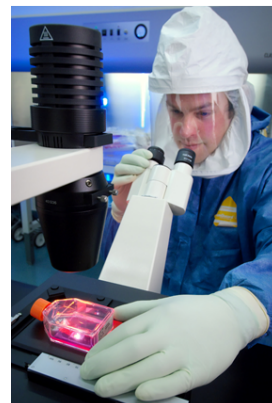

Figure 3: Kris, Sr Biologist – Advanced

Photo credits: unsplash.com

Table 1: Personas are built based on the insights from the preliminary user research. The table describes how the data from Google Analytics study are reflected in the personas' characteristics and/or behaviours.

| Insights from user research (Google Analytics)                      | Personas' characteristics and/or behaviours                                                       |
|---------------------------------------------------------------------|---------------------------------------------------------------------------------------------------|
| Acquisition: Direct (32%)                                           | <b>Miranda</b> Accesses the website directly                                                      |
| Devices: Desktop (94%)                                              | <b>Chloe</b> Uses a Desktop<br>Uses Google<br>Lands on the home page<br>Clicks on Transcriptomics |
| Acquisition: Organic search (56%)                                   |                                                                                                   |
| User behaviour: 54% of Google users land on the home page           |                                                                                                   |
| User behaviour: 20% of Google users click on a category             |                                                                                                   |
| Acquisition: Direct (32%)                                           | <b>Kris</b> Accesses the website directly<br>Types a search term in the search box                |
| User behaviour: 15% of direct accesses use the search functionality |                                                                                                   |
